# Supplementary material
Source: PubMed Central journal article supplement (PMC9119706)
Supplement: NIHMS1807486-supplement-supplementary.pdf [file NIHMS1807486-supplement-supplementary.pdf]

**SUPPLEMENTARY TABLES**

**Supplementary Table 1. Paired treatment naïve LN and PB CLL samples: patient characteristics.**

|                           | <b>Number</b> | <b>%</b> |
|---------------------------|---------------|----------|
| <b>Median age (years)</b> | 56 (33-73)    |          |
| <b>Gender</b>             |               |          |
|                           | Male          | 10 59    |
|                           | Female        | 7 41     |
| <b>Rai Stage</b>          |               |          |
|                           | I             | 5 29.5   |
|                           | II            | 4 23.5   |
|                           | III           | 4 23.5   |
|                           | IV            | 4 23.5   |
| <b>IGHV mutation</b>      |               |          |
|                           | Un-mutated    | 10 59    |
|                           | Mutated       | 4 23.5   |
| <b>ZAP70</b>              |               |          |
|                           | +             | 9 53     |
|                           | -             | 7 41     |
| <b>CD38</b>               |               |          |
|                           | +             | 9 53     |
|                           | -             | 8 47     |
| <b>17p deletion</b>       |               |          |
|                           | Deleted       | 5 29.5   |
|                           | Non deleted   | 12 70.5  |

**Supplementary Table 2. Clinical and laboratory parameters of CLL patients treated with ibrutinib.**

|                                                                  | <b>Number</b>    | <b>%</b> |
|------------------------------------------------------------------|------------------|----------|
| <b>Median age (years)</b>                                        | 66 (33 - 85)     |          |
| <b>Gender</b>                                                    |                  |          |
| Male                                                             | 22               | 55       |
| Female                                                           | 18               | 45       |
| <b>Median absolute lymphocytic count ALC (x10<sup>9</sup>/L)</b> |                  |          |
| ALC pre-treatment (min. - max.)                                  | 75.6 (0.5 - 402) |          |
| ALC 28 days post-treatment (min. - max.)                         | 87 (2.6 - 475.3) |          |
| <b>Rai Stage</b>                                                 |                  |          |
| I                                                                | 8                | 20       |
| II                                                               | 3                | 7.5      |
| III                                                              | 5                | 12.5     |
| IV                                                               | 24               | 60       |
| <b>IGHV mutation</b>                                             |                  |          |
| Unmutated                                                        | 23               | 57.5     |
| Mutated                                                          | 17               | 42.5     |
| <b>ZAP70</b>                                                     |                  |          |
| +                                                                | 12               | 30       |
| -                                                                | 15               | 37.5     |
| <b>CD38</b>                                                      |                  |          |
| +                                                                | 15               | 37.5     |
| -                                                                | 25               | 62.5     |
| <b>17p deletion</b>                                              |                  |          |
| Deleted                                                          | 23               | 57.5     |
| Non deleted                                                      | 17               | 42.5     |
| <b>Nodal response to ibrutinib</b>                               |                  |          |
| Responders                                                       | 25               | 62.5     |
| Non-responders                                                   | 13               | 32.5     |

**Supplementary Table 3. RT and PCR primers.**

| <b>Primer</b>                       | <b>Sequence</b>                                                                                                          |
|-------------------------------------|--------------------------------------------------------------------------------------------------------------------------|
| let-7a_F                            | 5'- GGG CCT GAG GTA GTA GGT TGT ATA GTT -3'                                                                              |
| let-7a-3p_F                         | 5'- GGG GCC CCT ATA CAA TCT ACT GTC TTT C -3'                                                                            |
| let-7g_F                            | 5'- GGC CGT GAG GTA GTA GTT TGT ACA GTT -3'                                                                              |
| miR-9_F                             | 5'- GGG CCT CTT TGG TTA TCT AGC TGT ATG A -3'                                                                            |
| miR-15a_F                           | 5'- GTG CCT AGC AGC ACA TAA TGG TTT GTG -3'                                                                              |
| miR-16_F                            | 5'- GTG CCT AGC AGC ACG TAA ATA TTG GCG -3'                                                                              |
| miR-17_F                            | 5'- GGC AAA GTG CTT ACA GTG CAG GTA G -3'                                                                                |
| miR-20a_F                           | 5'- GGG CCT AAA GTG CTT ATA GTG CAG GTA G -3'                                                                            |
| miR-21_F                            | 5'- GGG CCC TAG CTT ATC AGA CTG ATG TTG A -3'                                                                            |
| miR-22_F                            | 5'- GGC AGT TCT TCAGTGGCAAGC TTT A-3'                                                                                    |
| miR-29a_F                           | 5'- CCC GGA CTG ATT TCT TTT GGT GTT CAG -3'                                                                              |
| miR-29c-3p_F                        | 5'- GGC CTA GCA CCA TTT GAA ATC GGT TA -3'                                                                               |
| miR-29c_F                           | 5'- GGT GAC CGA TTT CTC CTG GTG TTC -3'                                                                                  |
| miR-34a_F                           | 5'- GGT GGC AGT GTC TTA GCT GGT TGT -3'                                                                                  |
| miR-106b_F                          | 5'- GTG CCT AAA GTG CTG ACA GTG CAG AT -3'                                                                               |
| miR-146b-F                          | 5'- GGC CTGAGAACTGAATTCCATAGGCT-3'                                                                                       |
| miR-150_F                           | 5'- GTC TCC CAA CCC TTG TAC CAG TG -3'                                                                                   |
| miR-155_F                           | 5'- GGG CCT TAA TGC TAA TCG TGA TAG GGG T -3'                                                                            |
| miR-181b_F                          | 5'- TGA CGA ACA TTC ATT GCT GTC GG -3'                                                                                   |
| miR-185_F                           | 5'- GCT GGA GAG AAA GGC AGT TCC TGA -3'                                                                                  |
| miR-223_F                           | 5'- GTG CCC GTG TAT TTG ACA AGC TGA GTT -3'                                                                              |
| miR-650_F                           | 5'- AGG AGG CAG CGC TCT CAG GAC -3'                                                                                      |
| RNU44_F                             | 5' - GGC AAA TGC TGA CTG AAC ATG AAG GTC - 3'                                                                            |
| Reverse transcription anchor primer | 5'- CGA CTC GAT CCA GTC TCA GGG TCC GAG GTA TTC<br>GAT CCT AAC CCT CTC CTC GGT ATC GAG TCG CAC TTT<br>TTT TTT TTT V - 3' |
| PCR reverse primer                  | 5' - GTC CGA GGT ATT CGA TCC TAA C - 3'                                                                                  |
| TaqMan probe                        | 5' - 6-FAM/ TCT CCT CGG /ZEN/ TAT CGA GTC GCA CT<br>/IABKFQ/ - 3'                                                        |

**Supplementary Table 4: Gene list of the nanoString nCounter assay.**

|        |        |         |         |       |
|--------|--------|---------|---------|-------|
| AKT1   | DNMT3A | LDOC1   | RUNX1   | TP53  |
| ARID1A | E2F1   | MAP2K1  | RUNX3   | WT1   |
| ARID1B | FBXW7  | MRE11A  | SAMHD1  | XPO1  |
| ARID2  | FOXP1  | NFKBIA  | SF3B1   | GUSB  |
| ASXL1  | GPS2   | NOTCH1  | SIRT1   | HPRT1 |
| ATM    | HDAC1  | PDCD1   | SMAD4   | TBP   |
| BAX    | IBTK   | PHLPP   | SOCS1   |       |
| CDKN1A | IDH1   | PTEN    | TCF21   |       |
| CYLD   | IKBKB  | RARRES3 | TET2    |       |
| DAPK1  | KLF4   | RB1     | TNFAIP3 |       |

**Supplementary Table 5. Differential miRNA expression in circulating CLL cells from 38 patients compared to circulating B cells from 33 healthy controls.**

| miRNA             | Median (IQR) in CTRL | Median (IQR) in CLL   | Fold | P value  | Trend in CLL |
|-------------------|----------------------|-----------------------|------|----------|--------------|
| <b>Let-7a</b>     | 129.6<br>(77.8-237)  | 767.6<br>(397-1080)   | 6    | < 0.0001 | Up           |
| <b>Let7a-3p</b>   | 0.1<br>(0.04-0.2)    | 0.76<br>(0.3-2.4)     | 7    | < 0.0001 | Up           |
| <b>Let-7g</b>     | 29.8<br>(18.8-50.7)  | 185.6<br>(60-342)     | 6    | < 0.0001 | Up           |
| <b>miR-9</b>      | 0.02<br>(0.01-0.1)   | 0.13<br>(0.02-0.9)    | 6.5  | 0.002    | Up           |
| <b>miR-15a</b>    | 39.4<br>(13.7-196)   | 869.7<br>(146.6-8131) | 22   | < 0.0001 | Up           |
| <b>miR-16</b>     | 66<br>(33.6-195.7)   | 1303<br>(453.7-2239)  | 19   | < 0.0001 | Up           |
| <b>miR-17</b>     | 0.6<br>(0.3-2)       | 6<br>(1.8-12.5)       | 10   | < 0.0001 | Up           |
| <b>miR-20a</b>    | 2.2<br>(1.2-8)       | 15.5<br>(5.8-34.3)    | 8    | < 0.0001 | Up           |
| <b>miR-21</b>     | 15.05<br>(6.8-30.2)  | 505.2<br>(202-655)    | 32   | < 0.0001 | Up           |
| <b>miR-22</b>     | 0.02<br>(0.02-0.06)  | 0.2<br>(0.02-0.4)     | 15   | 0.0009   | Up           |
| <b>miR-29a</b>    | 0.1<br>(0.02-0.5)    | 1.6<br>(0.4-3.7)      | 16   | < 0.0001 | Up           |
| <b>miR-29c-3p</b> | 45.6<br>(26-83.5)    | 681<br>(313-1126)     | 15   | < 0.0001 | Up           |
| <b>miR-29c</b>    | 0.1<br>(0.06-0.3)    | 0.8<br>(0.3-1.4)      | 8    | < 0.0001 | Up           |
| <b>miR-34a</b>    | 0.5<br>(0.1-1.02)    | 43.7<br>(12.4-174)    | 87   | < 0.0001 | Up           |
| <b>miR-106b</b>   | 1.3<br>(0.3-5.4)     | 9<br>(1.8-39)         | 7    | 0.0007   | Up           |
| <b>miR-146b</b>   | 14.4<br>(4.8-44.7)   | 127.4<br>(23-586.3)   | 9    | < 0.0001 | Up           |
| <b>miR-150</b>    | 6.9<br>(3.9-21)      | 192<br>(30.6-336)     | 30   | < 0.0001 | Up           |
| <b>miR-155</b>    | 10.6<br>(3.5-23.8)   | 307.4<br>(153.6-698)  | 29   | < 0.0001 | Up           |
| <b>miR-181b</b>   | 0.66<br>(0.5-1.1)    | 0.24<br>(0.07-0.85)   | -2.5 | 0.01     | Down         |

|                |                        |                      |    |          |    |
|----------------|------------------------|----------------------|----|----------|----|
| <b>miR-185</b> | 0.7<br>(0.2-1.5)       | 2.4<br>(1-3.7)       | 3  | < 0.0001 | Up |
| <b>miR-223</b> | 0.03<br>(0.01-0.16)    | 0.17<br>(0.07-0.4)   | 5  | 0.0017   | Up |
| <b>miR-650</b> | 0.001<br>(0.0005-0.01) | 0.085<br>(0.008-0.3) | 85 | < 0.0001 | Up |

Twenty-two miRNAs were assayed by TaqMan qPCR and with standard curves in PB CLL cells and circulating B-cells from healthy controls. The median and interquartile ranges of the miRNA quantity (fmoles/ng of total RNA) are shown. CTRL, healthy control; IQR, interquartile range. *P* values calculated by Student's T-test.

**Supplementary Table 6. Differential miRNA expression in PB CLL cells from 38 patients pre- and post-treatment (day 28) with ibrutinib.**

| miRNA             | Median in CLL patient samples pre-ibrutinib treatment (IQR) fmoles/ng total RNA | Median in CLL patient samples post-ibrutinib treatment (IQR) fmoles/ng total RNA | Fold change | p-value Wilcoxon | Trend |
|-------------------|---------------------------------------------------------------------------------|----------------------------------------------------------------------------------|-------------|------------------|-------|
| <b>Let7a</b>      | 805.2<br>(421-1079.7)                                                           | 782<br>(446.5-1090)                                                              | 1           | 0.9              | -     |
| <b>Let7a-3p</b>   | 0.78<br>(0.36-2.4)                                                              | 0.6<br>(0.3-2.4)                                                                 | -1.3        | 0.25             | -     |
| <b>Let7g</b>      | 204.7<br>(76-342)                                                               | 156.3<br>(94-321.2)                                                              | -1.3        | 0.5              | -     |
| <b>miR-9</b>      | 0.15<br>(0.04-0.9)                                                              | 0.06<br>(0.01-0.3)                                                               | -2.5        | 0.2              | -     |
| <b>miR-15a</b>    | 1079<br>(281-8131)                                                              | 550.4<br>(152.5-3033)                                                            | -2          | 0.08             | -     |
| <b>miR-16</b>     | 1315<br>(501.3-2239)                                                            | 1279.8<br>(594-2219.3)                                                           | 1           | 0.8              | -     |
| <b>miR-17</b>     | 6.4<br>(2.4-12.5)                                                               | 5.6<br>(2.3-12.8)                                                                | -1.1        | 0.9              | -     |
| <b>miR-20a</b>    | 17.2<br>(7.3-34.3)                                                              | 19.5<br>(10-37)                                                                  | 1.1         | 0.5              | -     |
| <b>miR-21</b>     | 530.9<br>(240.9-655)                                                            | 324<br>(131.7-576)                                                               | -1.6        | 0.3              | -     |
| <b>miR-22</b>     | 0.2<br>(0.04-0.4)                                                               | 0.06<br>(0.02-0.15)                                                              | -3.33       | 0.0008           | Down  |
| <b>miR-29a</b>    | 1.7<br>(0.7-3.7)                                                                | 2<br>(0.6-5.5)                                                                   | 1.17        | 0.3              | -     |
| <b>miR-29c-3p</b> | 688.7<br>(351.5-1126)                                                           | 817.2<br>(291.1-1586.5)                                                          | 1.18        | 0.59             | -     |
| <b>miR-29c</b>    | 0.8<br>(0.4-1.4)                                                                | 0.7<br>(0.3-1.2)                                                                 | -1.1        | 0.78             | -     |
| <b>miR-34a</b>    | 49.3<br>(14.6-174)                                                              | 8.9<br>(3.4-45.3)                                                                | -5.56       | 0.01             | Down  |
| <b>miR-106b</b>   | 13<br>(2.1-39)                                                                  | 9.2<br>(3.7-22.2)                                                                | -1.4        | 0.67             | -     |
| <b>miR-146b</b>   | 151.5<br>(68.3-687.8)                                                           | 27.6<br>(7.8-81.2)                                                               | -5.56       | < 0.0001         | Down  |
| <b>miR-150</b>    | 200.3<br>(68.3-336)                                                             | 227.4<br>(99-495)                                                                | 1.1         | 0.45             | -     |
| <b>miR-155</b>    | 343.9<br>(163.6-698)                                                            | 239<br>(122.5-469)                                                               | -1.4        | 0.08             | -     |

|                 |                      |                     |      |       |      |
|-----------------|----------------------|---------------------|------|-------|------|
| <b>miR-181b</b> | 0.26<br>(0.078-0.85) | 0.1<br>(0.02-0.24)  | -2.6 | 0.019 | Down |
| <b>miR-185</b>  | 2.6<br>(1.3-3.7)     | 1.8<br>(0.9-2.6)    | -1.4 | 0.079 | -    |
| <b>miR-223</b>  | 0.19<br>(0.1-0.4)    | 0.15<br>(0.05-0.3)  | -1.3 | 0.1   | -    |
| <b>miR-650</b>  | 0.1<br>(0.009-0.3)   | 0.06<br>(0.006-0.2) | -1.4 | 0.9   | -    |

The miRNA level was quantified by TaqMan qPCR and with standard curves. The median and interquartile range of the miRNA quantity (fmoles/ng of total RNA) are shown. Pre-tx, pre-treatment; post-tx, post-treatment; IQR, interquartile range. *P* values calculated by Wilcoxon paired test.

**Supplementary Table 7. Differential miRNA expression in PB CLL cells from 38 patients pre- and post-treatment (day 28) with ibrutinib: Responders and Non-Responders.**

| miRNA      | Responders<br>(N=24)                                                                                 | Non-Responders<br>(N=12)                                                                             | Responders                                                        | Non-                                                                    | Responder                                                                 |
|------------|------------------------------------------------------------------------------------------------------|------------------------------------------------------------------------------------------------------|-------------------------------------------------------------------|-------------------------------------------------------------------------|---------------------------------------------------------------------------|
|            | Median change in<br>CLL cells post-<br>ibrutinib treatment<br>compared to pre-<br>treatment<br>(IQR) | Median change in<br>CLL cells post-<br>ibrutinib treatment<br>compared to pre-<br>treatment<br>(IQR) | Pre-<br>treatment<br>compared to<br>post-<br>ibrutinib<br>p-value | Responders<br>Pre-treatment<br>compared to<br>post-ibrutinib<br>p-value | Pre-treatment<br>compared to<br>Non-Responder<br>Pre-treatment<br>p-value |
|            | Percent Change                                                                                       | Percent Change                                                                                       |                                                                   |                                                                         |                                                                           |
| Let7a      | 4.36%<br>(-38.11%-136.23%)                                                                           | -14.4%<br>(-54.4%-44.43%)                                                                            | 0.65                                                              | 0.53                                                                    | 0.73                                                                      |
| Let7a-3p   | -0.18%<br>(-63.17%-67.95%)                                                                           | -13.3%<br>(-84.8%-71.4%)                                                                             | 0.58                                                              | 0.27                                                                    | 0.63                                                                      |
| Let7g      | -34.62%<br>(-60.35% - 149.8%)                                                                        | 0.63%<br>(-43.42%-185.9%)                                                                            | 0.3                                                               | 0.8                                                                     | 0.89                                                                      |
| miR-9      | -60.24%<br>(-92.25% -160.5%)                                                                         | -88.82%<br>(-94.1% - 29.6%)                                                                          | 0.58                                                              | 0.11                                                                    | 0.48                                                                      |
| miR-15a    | -57.41%<br>(-92.34%-58.30%)                                                                          | 6.13%<br>(-47.15%-777.0%)                                                                            | 0.08                                                              | 0.94                                                                    | 0.39                                                                      |
| miR-16     | 10.64%<br>(-60.89%-588.72%)                                                                          | -30.66%<br>(-59.66%-33.57%)                                                                          | 0.84                                                              | 0.2                                                                     | 0.65                                                                      |
| miR-17     | 4.29%<br>(-66.41%-209.4%)                                                                            | -31.75%<br>(-59.16 – 151.5%)                                                                         | 0.88                                                              | 0.70                                                                    | 0.90                                                                      |
| miR-20a    | 55.89%<br>(-58.59% - 437.4%)                                                                         | 50.77%<br>(-38.64% - 77.88%)                                                                         | 0.66                                                              | 0.5                                                                     | 0.78                                                                      |
| miR-21     | -13.11%<br>(-70.92% - 98.68%)                                                                        | -66.26%<br>(-76.46 – 9.94%)                                                                          | 0.90                                                              | 0.16                                                                    | 0.54                                                                      |
| miR-22     | -59.44%<br>(-92.1% - 25.3%)                                                                          | -39.09%<br>(-92.89% - -4.27%)                                                                        | <b>0.02*</b>                                                      | <b>0.015*</b>                                                           | 0.20                                                                      |
| miR-29a    | 151.1%<br>(-66.67% - 558.2%)                                                                         | -4.29%<br>(-65.52% - 123.7%)                                                                         | 0.4                                                               | 0.3                                                                     | 0.95                                                                      |
| miR-29c-3p | 36.94%<br>(-43.49% -113.29%)                                                                         | -6.08%<br>(-54.51%-149.11%)                                                                          | 0.22                                                              | 0.8                                                                     | 0.90                                                                      |
| miR-29c    | 23.30%<br>(-57.91% - 98.1%)                                                                          | 17.5%<br>(-46.23 – 77.1%)                                                                            | 0.95                                                              | 0.70                                                                    | 0.76                                                                      |
| miR-34a    | -70.17%<br>(-90.36% - 31.22%)                                                                        | -71.82%<br>(-93.71% - 11.23%)                                                                        | <b>0.007**</b>                                                    | 0.13                                                                    | 0.88                                                                      |
| miR-106b   | 76.46%                                                                                               | -24.47%                                                                                              | 0.50                                                              | 0.80                                                                    | 0.17                                                                      |



|                 |                      |                    |                 |               |                |
|-----------------|----------------------|--------------------|-----------------|---------------|----------------|
|                 | (-85.90% - 1140.9%)  | (-90.03 - 219.6%)  |                 |               |                |
| <b>miR-146b</b> | -87.49%              | -87.8%             | <b>0.001***</b> | <b>0.02*</b>  | 0.41           |
|                 | (-925.39 - -58.81%)  | (-93.65 - -75.1%)  |                 |               |                |
| <b>miR-150</b>  | 85.8%                | 2.37%              | 0.25            | 1             | 0.22           |
|                 | (-56.26% - 379.4%)   | (-40.78% - 165.0%) |                 |               |                |
| <b>miR-155</b>  | -14.10%              | -53.79%            | 0.60            | <b>0.028*</b> | 0.70           |
|                 | (-64.37% - 137.15%)  | (-74.38% - -36.9%) |                 |               |                |
| <b>miR-181b</b> | -76.19%              | 5.34%              | <b>0.024*</b>   | 0.48          | 0.72           |
|                 | (-96.27% - 10.94%)   | (-92.64% - 79.02%) |                 |               |                |
| <b>miR-185</b>  | -39.68%              | -47.13%            | <b>0.049*</b>   | 0.81          | 0.87           |
|                 | (-77.86% - 8.39%)    | (-60.1% - 106.6%)  |                 |               |                |
| <b>miR-223</b>  | -51.1%               | -56.79%            | 0.53            | 0.08          | <b>0.007**</b> |
|                 | (-88.00% - 191.4%)   | (-76.84% - -21.7%) |                 |               |                |
| <b>miR-650</b>  | -19.15%              | -4.29%             | 0.98            | 0.9           | 0.67           |
|                 | (-96.77% - 2647.51%) | (-65.52% - 123.7%) |                 |               |                |

The miRNA level was quantified by TaqMan qPCR and with standard curves. The median and interquartile range of the miRNA percentage change from pre-treatment to post-treatment are shown. Pre-tx, pre-treatment; post-tx, post-treatment; IQR, interquartile range. *P* values calculated by Wilcoxon paired test. Significant p-values are bolded and marked with asterisks (\* p-value < 0.05 \*\* p-value < 0.01 \*\*\* p-value < 0.001)

**Supplementary Table 8. Differential miRNA expression in PB CLL cells from 38 patients pre- and post-treatment (day 28) with ibrutinib: Absolute values of miRNA in CLLs that were found to be significant for comparisons in responders and non-responders.**

| miRNA           | Responders                                                                      |                                                                                  |         | Non-Responders                                                                  |                                                                                  |         |
|-----------------|---------------------------------------------------------------------------------|----------------------------------------------------------------------------------|---------|---------------------------------------------------------------------------------|----------------------------------------------------------------------------------|---------|
|                 | Median in CLL patient samples pre-ibrutinib treatment (IQR) fmoles/ng total RNA | Median in CLL patient samples post-ibrutinib treatment (IQR) fmoles/ng total RNA | P Value | Median in CLL patient samples pre-ibrutinib treatment (IQR) fmoles/ng total RNA | Median in CLL patient samples post-ibrutinib treatment (IQR) fmoles/ng total RNA | P Value |
| <b>miR-22</b>   | 0.119<br>(0.03 – 0.42)                                                          | 0.045<br>(0.013 – 0.15)                                                          | 0.02    | 0.282<br>(0.15 – 0.49)                                                          | 0.115<br>(0.018 – 0.18)                                                          | 0.015   |
| <b>miR-34a</b>  | 48.64<br>(13.1 – 175.65)                                                        | 9.00<br>(3.70 – 32.75)                                                           | 0.007   | 52.17<br>(22.74 – 92.26)                                                        | 7.54<br>(3.41 – 45.32)                                                           | 0.13    |
| <b>miR-146b</b> | 202.65<br>(45.71 - 725.67)                                                      | 41.32<br>(10.95 - 95.78)                                                         | 0.001   | 127.41<br>(80.79 – 203.58)                                                      | 12.53<br>(7.32 – 31.1)                                                           | 0.02    |
| <b>miR-155</b>  | 265.95<br>(163.6 – 846.9)                                                       | 310.79<br>(152.3 – 496.5)                                                        | 0.6     | 402.00<br>(204.4 – 652.9)                                                       | 198.93<br>(97.53 – 445.25)                                                       | 0.028   |
| <b>miR-181b</b> | 0.289<br>(0.09 – 1.49)                                                          | 0.09<br>(0.02 – 0.26)                                                            | 0.024   | 0.21<br>(0.09 – 0.75)                                                           | 0.1<br>(0.03 – 0.18)                                                             | 0.48    |
| <b>miR-185</b>  | 3.28<br>(0.89 - 3.86)                                                           | 1.88<br>(0.66 – 2.60)                                                            | 0.049   | 2.45<br>(1.69 – 3.00)                                                           | 1.65<br>(0.97 – 3.79)                                                            | 0.81    |
| <b>miR-223</b>  | 0.14<br>(0.07 – 0.28)                                                           | 0.14<br>(0.034 – 0.29)                                                           | 0.53    | 0.42<br>(0.31-1.74)                                                             | 0.22<br>(0.91 – 0.56)                                                            | 0.08    |

The miRNA level was quantified by TaqMan qPCR in duplicate and with standard curves. The median and interquartile range of the miRNA quantity (fmoles/ng of total RNA) are shown. Pre-tx, pre-treatment; post-tx, post-treatment; IQR, interquartile range.

**Supplementary Table 9. mRNA counts of putative tumor suppressor targets of miR-22, miR-34a, miR-146b, and miR-181b in PB CLL cells from 38 patients pre- and post-treatment (day 28) with ibrutinib.**

| mRNA          | Avg. (SD) pre-tx | Avg. (SD) post-tx | Fold change | <i>P</i> value | Trend in post-tx |
|---------------|------------------|-------------------|-------------|----------------|------------------|
| <b>ARID1B</b> | 578 (±325)       | 787 (±377)        | 1.4         | 0.011          | Up               |
| <b>ARID2</b>  | 490 (±260)       | 635 (±275)        | 1.3         | 0.027          | Up               |
| <b>ATM</b>    | 274 (±130)       | 332 (±209)        | 1.2         | 0.046          | Up               |
| <b>CYLD</b>   | 2132 (±1124)     | 3014 (±1298)      | 1.4         | 0.033          | Up               |
| <b>FOXP1</b>  | 1001 (±950)      | 1561 (±1304)      | 1.6         | 0.023          | Up               |
| <b>HDAC1</b>  | 740 (±303)       | 981 (±410)        | 1.3         | 0.012          | Up               |
| <b>IBTK</b>   | 141 (±159)       | 172 (±133)        | 1.2         | 0.04           | Up               |
| <b>PTEN</b>   | 1090 (±406)      | 1272 (±668)       | 1.2         | 0.05           | Up               |
| <b>SMAD4</b>  | 834 (±402)       | 1159 (±588)       | 1.4         | 0.003          | Up               |

mRNA counts were obtained from nanoString nCounter assay. Avg., average; SD, standard deviation; pre-tx, pre-treatment; post-tx, post-treatment. *P* values calculated by Wilcoxon paired test.

**Supplemental Table 10. Differential gene expression between CLL cells in PB and in LN.**

| mRNA          | Median (IQR) in PB  | Median (IQR) in LN  | Fold change | P value | Trend |
|---------------|---------------------|---------------------|-------------|---------|-------|
| <b>ARID1B</b> | 7<br>(4.6-8.3)      | 5<br>(3.3-6.2)      | -1.4        | 0.01    | Down  |
| <b>ARID2</b>  | 20.9<br>(18.4-27.3) | 22.8<br>(15.6-32.3) | 1.1         | 0.36    | -     |
| <b>ATM</b>    | 31.1<br>(25.6-36.3) | 45.2<br>(19.9-56.7) | 1.3         | 0.11    | -     |
| <b>CYLD</b>   | 2.5<br>(1.7-3.5)    | 1.6<br>(1.3-2)      | -1.6        | 0.04    | Down  |
| <b>FOXP1</b>  | 68.6<br>(52-72)     | 49.4<br>(35-74)     | -1.4        | 0.006   | Down  |
| <b>HDAC1</b>  | 68.6<br>(52-72)     | 49.4<br>(35-74)     | -1.4        | 0.4     | -     |
| <b>IBTK</b>   | 7<br>(4.6-8.3)      | 5<br>(3.3-6.2)      | -1.4        | 0.06    | -     |
| <b>PTEN</b>   | 2.5<br>(1.7-3.5)    | 1.6<br>(1.3-2)      | -1.5        | 0.22    | -     |
| <b>SMAD4</b>  | 68.6<br>(52-72)     | 49.4<br>(35-74)     | -1.4        | 0.33    | -     |

Gene expression was determined by TaqMan qPCR performed in triplicate. RNA from 17 paired and treatment naïve PB and LN CLL cells was used. The median and interquartile range of the relative mRNA expression are shown. *P* values calculated by Wilcoxon paired test.

**Supplementary Table 11. Differential gene expression in cell lines treated with Ibrutinib**

| <b>mRNA</b>   | <b>Cell Line</b> | <b>Percent Change<br/>Untreated to<br/>Treated</b> | <b>P value</b> |
|---------------|------------------|----------------------------------------------------|----------------|
| <b>ARID1b</b> | MEC1             | 56.69%                                             | 0.0005         |
| <b>ARID2</b>  | MEC1             | 35.21%                                             | 0.0028         |
| <b>ATM</b>    | MEC1             | 35.48%                                             | 0.039          |
| <b>CYLD</b>   | MEC1             | 19.49%                                             | 0.0014         |
| <b>FOXP1</b>  | MEC1             | 199.22%                                            | 0.0055         |
| <b>HDAC1</b>  | MEC1             | 65.82%                                             | 0.033          |
| <b>IBTK</b>   | MEC1             | 45.42%                                             | 0.0037         |
| <b>PTEN</b>   | MEC1             | 20.57%                                             | 0.066          |
| <b>SMAD4</b>  | MEC1             | 12.89%                                             | 0.0038         |
| <b>ARID1b</b> | SP53             | 175.97%                                            | 0.001          |
| <b>ARID2</b>  | SP53             | 155.97%                                            | 0.0009         |
| <b>ATM</b>    | SP53             | 290.76%                                            | 0.0005         |
| <b>CYLD</b>   | SP53             | 65.35%                                             | 0.01           |
| <b>FOXP1</b>  | SP53             | 164.80%                                            | 0.0002         |
| <b>HDAC1</b>  | SP53             | 76.92%                                             | 0.002          |
| <b>IBTK</b>   | SP53             | 157.62%                                            | 0.006          |
| <b>PTEN</b>   | SP53             | 180.27%                                            | 0.0001         |
| <b>SMAD4</b>  | SP53             | 118.89%                                            | 0.002          |

Gene expression was determined by TaqMan qPCR performed in triplicate. RNA from MEC1 and SP53 cell lines treated with of Ibrutinib for 48 hours was compared to untreated cells. Percent change in expression levels is shown from untreated cells to treated cells with the associated p-value. *P* values calculated by Student's t-test.

**Supplementary Table 12. Differential gene expression in cell lines transfected with pre-miRNA and anti-miRNA constructs.**

| <u>Pre-miR</u> |              |          |         | <u>Anti-miR</u> |         |               |          |         |          |         |
|----------------|--------------|----------|---------|-----------------|---------|---------------|----------|---------|----------|---------|
|                |              | MEC-1    |         | SP53            |         | MEC-1         |          | SP53    |          |         |
| mRNA           | Transfection | % Change | p-value | % Change        | p-value | Transfection  | % Change | p-value | % Change | p-value |
| <b>ARID1b</b>  | pre-miR 34a  | -23.67%  | 0.007   | -49.02%         | 0.014   | anti-miR 34a  | 0.69%    | 0.91    | -9.02%   | 0.86    |
| <b>ATM</b>     | pre-miR 34a  | 1.89%    | 0.75    | -19.30%         | 0.067   | anti-miR 34a  | 28.62%   | 0.28    | 178.04%  | 0.003   |
| <b>CYLD</b>    | pre-miR 34a  | -52.39%  | 0.0004  | -10.26%         | 0.31    | anti-miR 34a  | -34.15%  | 0.066   | -3.92%   | 0.83    |
| <b>FOXP1</b>   | pre-miR 34a  | -19.23%  | 0.10    | -1.21%          | 0.75    | anti-miR 34a  | -14.99%  | 0.53    | 898.78%  | 0.011   |
| <b>HDAC1</b>   | pre-miR 34a  | -20.06%  | 0.03    | -27.21%         | 0.001   | anti-miR 34a  | 39.56%   | 0.03    | 922.51%  | 0.001   |
| <b>IBKT</b>    | pre-miR 34a  | -35.81%  | 0.02    | -14.88%         | 0.087   | anti-miR 34a  | -3.66%   | 0.52    | 10.68%   | 0.59    |
| <b>PTEN</b>    | pre-miR 34a  | -30.63%  | 0.065   | -18.63%         | 0.25    | anti-miR 34a  | -8.25%   | 0.71    | -4.54%   | 0.78    |
| <b>SMAD4</b>   | pre-miR 34a  | -16.37%  | 0.029   | -24.57%         | 0.06    | anti-miR 34a  | 265.02%  | 0.002   | 354.67%  | 0.023   |
| <b>ARID1b</b>  | pre-miR 146b | -46.84%  | 0.0002  | -34.79%         | 0.066   | anti-miR 146b | 16.21%   | 0.15    | 175.97%  | 0.001   |
| <b>ATM</b>     | pre-miR 146b | -36.18%  | 0.03    | -24.32%         | 0.033   | anti-miR 146b | 21.67%   | 0.08    | 412.87%  | 0.003   |
| <b>CYLD</b>    | pre-miR 146b | -47.34%  | 0.01    | -19.99%         | 0.12    | anti-miR 146b | -38.44%  | 0.071   | -8.15%   | 0.64    |
| <b>FOXP1</b>   | pre-miR 146b | -50.98%  | 0.0002  | 13.62%          | 0.06    | anti-miR 146b | 8.21%    | 0.33    | 8.63%    | 0.22    |
| <b>HDAC1</b>   | pre-miR 146b | -40.83%  | 0.004   | -29.26%         | 0.02    | anti-miR 146b | 46.65%   | 0.009   | 880.40%  | 0.001   |
| <b>IBKT</b>    | pre-miR 146b | -12.83%  | 0.23    | -25.19%         | 0.03    | anti-miR 146b | -4.06%   | 0.41    | -3.42%   | 0.81    |
| <b>PTEN</b>    | pre-miR 146b | -9.15%   | 0.48    | -28.97%         | 0.13    | anti-miR 146b | -6.68%   | 0.38    | -33.34%  | 0.083   |
| <b>SMAD4</b>   | pre-miR 146b | -37.43%  | 0.0014  | -28.88%         | 0.026   | anti-miR 146b | 847.99%  | 0.0005  | 369.78%  | 0.00001 |

Gene expression was determined by TaqMan qPCR performed in triplicate. RNA from MEC1 and SP53 cell lines transfected with pre-miRNA constructs or anti-miRNA constructs was compared to those treated with scramble control oligos. Percent change in expression levels is shown from untreated cells to treated cells with the associated p-value. *P* values calculated by Student's t-test

**Supplementary Table 13. Differential gene expression of proliferation markers in cell lines transfected with anti-miRNA constructs.**

| <b>Marker</b> | <b>Cell/Transfection</b> | <b>Percent Change</b> | <b>P-Value</b> |
|---------------|--------------------------|-----------------------|----------------|
| <b>KI67</b>   | MEC1 anti-miR 34a        | -7.49%                | 0.231          |
| <b>TOP2a</b>  | MEC1 anti-miR 34a        | -17.81%               | 0.152          |
| <b>TPX</b>    | MEC1 anti-miR 34a        | -28.86%               | 0.02           |
| <b>KI67</b>   | MEC1 anti-miR 146b       | -18.34%               | 0.38           |
| <b>TOP2a</b>  | MEC1 anti-miR 146b       | -23.54%               | 0.31           |
| <b>TPX</b>    | MEC1 anti-miR 146b       | -23.01%               | 0.049          |
| <b>KI67</b>   | SP53 anti-miR 34a        | -15.63%               | 0.035          |
| <b>TOP2a</b>  | SP53 anti-miR 34a        | -30.34%               | 0.0225         |
| <b>TPX</b>    | SP53 anti-miR 34a        | -34.09%               | 0.0001         |
| <b>KI67</b>   | SP53 anti-miR 146b       | -30.55%               | 0.003          |
| <b>TOP2a</b>  | SP53 anti-miR 146b       | -27.13%               | 0.026          |
| <b>TPX</b>    | SP53 anti-miR 146b       | -2.55%                | 0.69           |

Gene expression was determined by TaqMan qPCR performed in triplicate. RNA from MEC1 and SP53 cell lines transfected with anti-miRNA constructs was compared to those treated with scramble control oligos. Percent change in expression levels is shown from untreated cells to treated cells with the associated p-value. *P* values calculated by Student's t-test
